# Supplementary material for: Synthesis of isomorphously substituted extra-large pore UTL zeolites
Source: Royal Society of Chemistry journal article supplement (doi:10.1039/c2jm31725g), 2012-01-01
Supplement: c2jm31725g.pdf [file c2jm31725g.pdf]

## Supporting Information

### Synthesis of isomorphously substituted extra-large pore UTL zeolites

Mariya V. Shamzhy<sup>a,b</sup>, Oleksiy V. Shvets<sup>b</sup>, Maksym V. Opanasenko<sup>a,b</sup>, Pavel S. Yaremov<sup>b</sup>, Liana G. Sarkisyan<sup>b</sup>, Pavla Chlubná<sup>a</sup>, Arnošt Zuka<sup>a</sup> and Jiří Čejka<sup>a,1</sup>

<sup>a</sup>J. Heyrovský Institute of Physical Chemistry, Academy of Sciences of Czech Republic, v.v.i. Dolejškova 3, 182 23 Prague 8, Czech Republic.

<sup>b</sup>L.V. Pisarzhevskiy Institute of Physical Chemistry, National Academy of Sciences of Ukraine, pr. Nauky, 31 Kyiv 03028, Ukraine. Fax: (+380)445 256 216; Tel: (+380)445 251 190

<sup>1</sup>To whom correspondence should be addressed.

E-mail: [jiri.cejka@jh-inst.cas.cz](mailto:jiri.cejka@jh-inst.cas.cz)

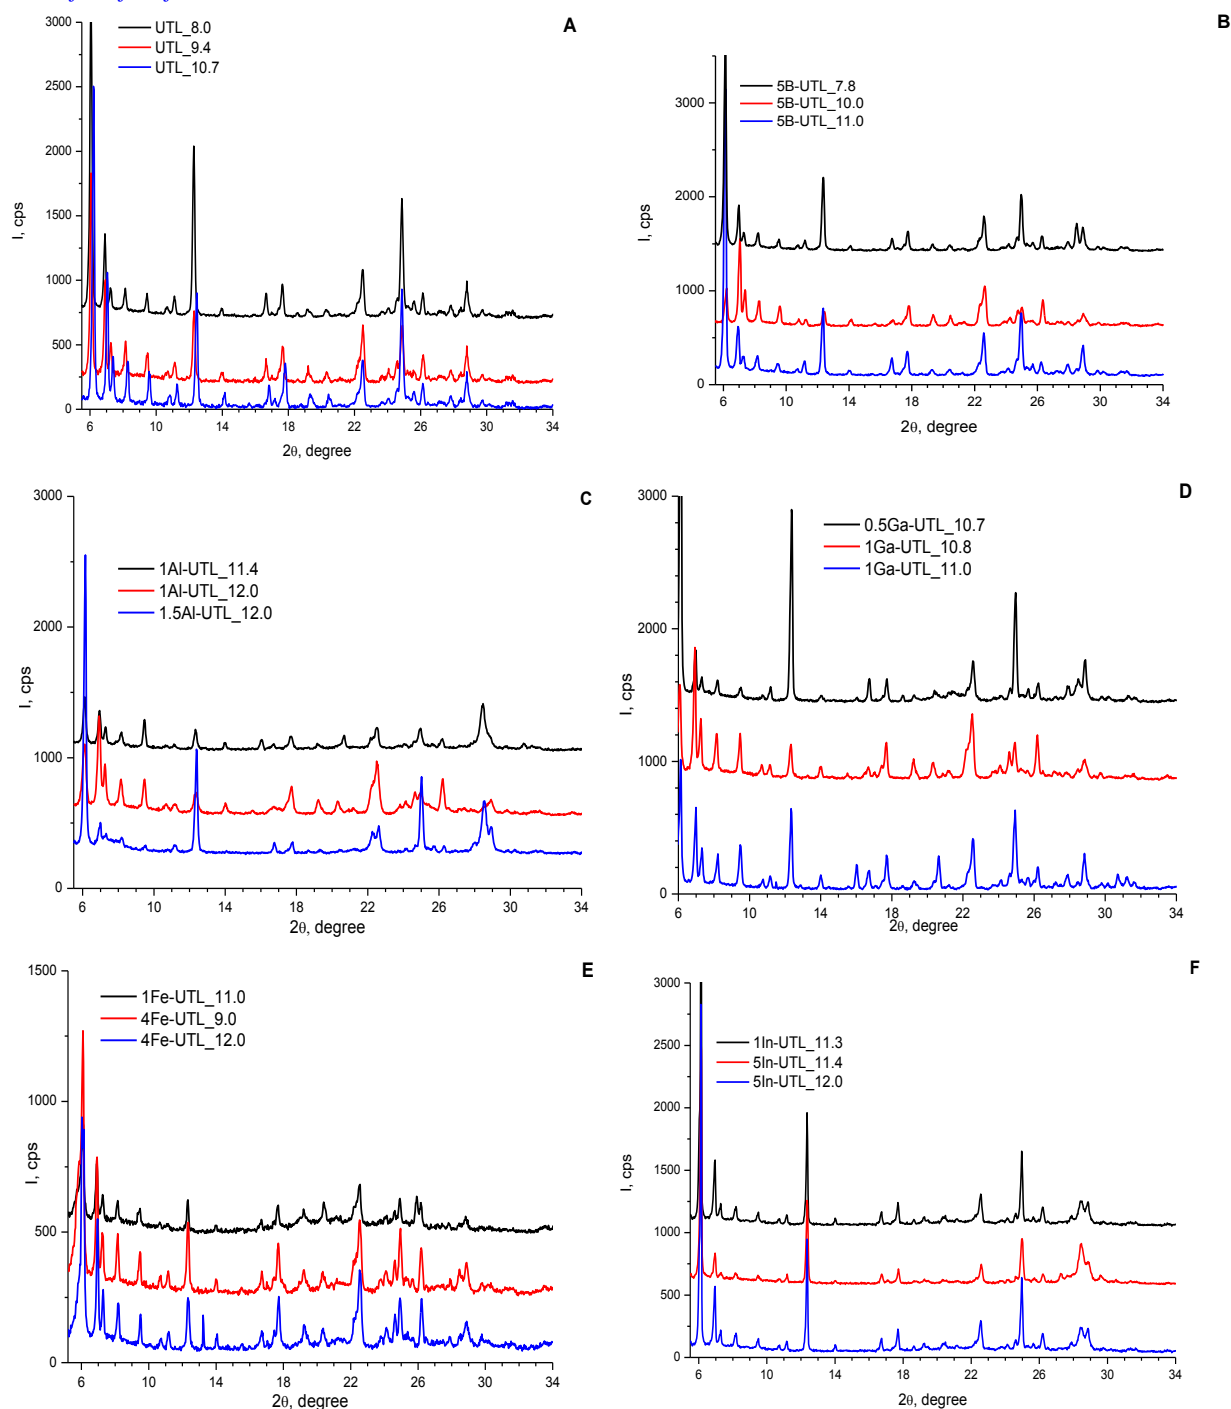

**Figure SI-1.** XRD patterns of **A)** germanosilicate, **B)** B-, **C)** Al-, **D)** Ga-, **E)** Fe- and **F)** In-containing zeolites with UTL topology, synthesized from reaction mixtures with different content of respective heteroelement and pH value (Si/Ge  $\approx$  2, 175 °C, 4 – 28 days)  
**Table SI-1.** Details of the most representative synthesis of UTL zeolites.

| Heteroelement | Samples         | Reactant mixtures, moles |                  |                   |                  |       | pH    | Time, days | Phases                                       |
|---------------|-----------------|--------------------------|------------------|-------------------|------------------|-------|-------|------------|----------------------------------------------|
|               |                 | SiO <sub>2</sub>         | GeO <sub>2</sub> | EO <sub>1.5</sub> | H <sub>2</sub> O | SDA   |       |            |                                              |
| -             | UTL_6.9/II      | 0.8                      | 0.4              | 0                 | 30               | 0.4   | 6.92  | 7          | UTL+ $\beta$ -GeO <sub>2</sub>               |
|               | UTL_6.9/III     | 0.8                      | 0.4              | 0                 | 30               | 0.4   | 6.90  | 12         | $\beta$ -GeO <sub>2</sub> +UTL               |
|               | UTL_7.3         | 0.8                      | 0.4              | 0                 | 30               | 0.4   | 7.30  | 6          | UTL                                          |
|               | UTL_9.5         | 0.8                      | 0.4              | 0                 | 30               | 0.4   | 9.48  | 4          | UTL                                          |
|               | UTL_12.1        | 0.8                      | 0.4              | 0                 | 30               | 0.4   | 12.1  | 4          | UTL                                          |
|               | UTL_12.2        | 0.8                      | 0.4              | 0                 | 30               | 0.4   | 12.19 | 4          | UTL+STF                                      |
|               | UTL_12.3        | 0.8                      | 0.4              | 0                 | 30               | 0.4   | 12.27 | 3          | STF                                          |
| B             | 1B-UTL_7.0/I    | 0.788                    | 0.4              | 0.012             | 30               | 0.4   | 7.02  | 7          | amor                                         |
|               | 1B-UTL_7.0/II   | 0.788                    | 0.4              | 0.012             | 30               | 0.4   | 7.05  | 13         | $\alpha$ -quartz + $\beta$ -GeO <sub>2</sub> |
|               | 1B-UTL_7.8      | 0.788                    | 0.4              | 0.012             | 30               | 0.4   | 7.82  | 7          | UTL                                          |
|               | 1B-UTL_9.5      | 0.788                    | 0.4              | 0.012             | 30               | 0.4   | 9.50  | 7          | UTL                                          |
|               | 1B-UTL_11.8     | 0.788                    | 0.4              | 0.012             | 30               | 0.4   | 11.82 | 7          | UTL                                          |
|               | 1B-UTL_12.1     | 0.788                    | 0.4              | 0.012             | 30               | 0.4   | 12.09 | 6          | UTL                                          |
|               | 1B-UTL_12.2     | 0.788                    | 0.4              | 0.012             | 30               | 0.4   | 12.17 | 6          | UTL+STF                                      |
|               | 5B-UTL_9.0      | 0.740                    | 0.4              | 0.06              | 30               | 0.4   | 9.07  | 13         | UTL                                          |
|               | 11 B-UTL_11.6   | 0.680                    | 0.4              | 0.120             | 30               | 0.4   | 11.64 | 8          | UTL                                          |
|               | 13 B-UTL_10.9   | 0.644                    | 0.4              | 0.156             | 30               | 0.4   | 10.92 | 14         | UTL                                          |
|               | 15 B-UTL_10.1   | 0.62                     | 0.4              | 0.18              | 30               | 0.4   | 10.12 | 17         | UTL+STF                                      |
|               | 15 B-UTL_11.0   | 0.62                     | 0.4              | 0.18              | 30               | 0.4   | 11.0  | 15         | STF                                          |
| 15 B-UTL_10.0 | 0.62            | 0.4                      | 0.18             | 30                | 0.4              | 10.0  | 12    | UTL+STF    |                                              |
| Fe            | 1Fe-UTL_7.2/I   | 0.788                    | 0.4              | 0.012             | 30               | 0.4   | 7.22  | 9          | amor                                         |
|               | 1Fe-UTL_8.0/II  | 0.788                    | 0.4              | 0.012             | 30               | 0.4   | 7.35  | 13         | $\alpha$ -quartz + $\beta$ -GeO <sub>2</sub> |
|               | 1Fe-UTL_7.5     | 0.788                    | 0.4              | 0.012             | 30               | 0.4   | 7.52  | 9          | UTL                                          |
|               | 1Fe-UTL_9.5     | 0.788                    | 0.4              | 0.012             | 30               | 0.4   | 9.50  | 8          | UTL                                          |
|               | 1Fe-UTL_10.7    | 0.788                    | 0.4              | 0.012             | 30               | 0.4   | 10.66 | 7          | UTL                                          |
|               | 1Fe-UTL_11.9    | 0.788                    | 0.4              | 0.012             | 30               | 0.4   | 11.86 | 6          | UTL                                          |
|               | 1Fe-UTL_12.0    | 0.788                    | 0.4              | 0.012             | 30               | 0.4   | 11.97 | 6          | UTL+STF                                      |
|               | 1Fe-UTL_12.0    | 0.788                    | 0.4              | 0.012             | 30               | 0.4   | 12.05 | 5          | STF                                          |
|               | 3Fe-UTL_11.2    | 0.764                    | 0.4              | 0.036             | 30               | 0.4   | 11.22 | 9          | UTL                                          |
|               | 5Fe-UTL_11.8    | 0.74                     | 0.4              | 0.06              | 30               | 0.4   | 11.76 | 21         | UTL                                          |
| 6Fe-UTL_11.5  | 0.728           | 0.4                      | 0.072            | 30                | 0.4              | 11.49 | 23    | UTL        |                                              |
| Ga            | 1Ga-UTL_7.1/I   | 0.788                    | 0.4              | 0.012             | 30               | 0.4   | 7.12  | 9          | amor                                         |
|               | 1Ga-UTL_7.1/II  | 0.788                    | 0.4              | 0.012             | 30               | 0.4   | 7.16  | 15         | $\alpha$ -quartz + $\beta$ -GeO <sub>2</sub> |
|               | 1Ga-UTL_8.2     | 0.788                    | 0.4              | 0.012             | 30               | 0.4   | 8.22  | 9          | UTL                                          |
|               | 1Ga-UTL_9.5     | 0.788                    | 0.4              | 0.012             | 30               | 0.4   | 9.45  | 9          | UTL                                          |
|               | 1Ga-UTL_11.0    | 0.788                    | 0.4              | 0.012             | 30               | 0.4   | 10.96 | 8          | UTL                                          |
|               | 1Ga-UTL_11.2    | 0.788                    | 0.4              | 0.012             | 30               | 0.4   | 11.20 | 7          | UTL+STF                                      |
|               | 1Ga-UTL_11.8    | 0.788                    | 0.4              | 0.012             | 30               | 0.4   | 11.80 | 7          | STF                                          |
|               | 1.5 Ga-UTL_10.8 | 0.782                    | 0.4              | 0.018             | 30               | 0.4   | 10.80 | 20         | UTL                                          |
|               | 2 Ga-UTL_10.8   | 0.776                    | 0.4              | 0.024             | 30               | 0.4   | 10.76 | 23         | STF                                          |
|               | 2 Ga-UTL_9.6    | 0.776                    | 0.4              | 0.024             | 30               | 0.4   | 9.56  | 25         | UTL+STF                                      |
| 2 Ga-UTL_11.4 | 0.776           | 0.4                      | 0.024            | 30                | 0.4              | 11.35 | 21    | STF        |                                              |
| Al            | 1Al-UTL_9.5/I   | 0.788                    | 0.4              | 0.012             | 30               | 0.4   | 9.52  | 20         | amor                                         |
|               | 1Al-UTL_9.5/II  | 0.788                    | 0.4              | 0.012             | 30               | 0.4   | 9.55  | 28         | $\alpha$ -quartz + $\beta$ -GeO <sub>2</sub> |
|               | 1Al-UTL_11.4    | 0.788                    | 0.4              | 0.012             | 30               | 0.4   | 11.38 | 20         | UTL                                          |
|               | 1Al-UTL_11.8    | 0.788                    | 0.4              | 0.012             | 30               | 0.4   | 11.84 | 20         | UTL                                          |
|               | 1Al-UTL_12.0    | 0.788                    | 0.4              | 0.012             | 30               | 0.4   | 12.03 | 20         | UTL                                          |
|               | 1Al-UTL_12.1    | 0.788                    | 0.4              | 0.012             | 30               | 0.4   | 12.15 | 20         | UTL+STF                                      |
|               | 1Al-UTL_12.4    | 0.788                    | 0.4              | 0.012             | 30               | 0.4   | 12.37 | 20         | STF                                          |
|               | 1.5Al-UTL_12.0  | 0.782                    | 0.4              | 0.018             | 30               | 0.4   | 12.03 | 28         | UTL                                          |
|               | 2 Al-UTL_11.8   | 0.776                    | 0.4              | 0.024             | 30               | 0.4   | 11.77 | 30         | UTL+STF                                      |
|               | 2 Al-UTL_12.0   | 0.776                    | 0.4              | 0.024             | 30               | 0.4   | 12.04 | 28         | STF                                          |
| 2 Al-UTL_12.1 | 0.776           | 0.4                      | 0.024            | 30                | 0.4              | 12.13 | 26    | STF        |                                              |
| In            | 1In-UTL_11.0/I  | 0.788                    | 0.4              | 0.012             | 30               | 0.4   | 10.98 | 7          | amor                                         |
|               | 1In-UTL_11.0/II | 0.788                    | 0.4              | 0.012             | 30               | 0.4   | 11.08 | 13         | $\alpha$ -quartz + $\beta$ -GeO <sub>2</sub> |
|               | 1In-UTL_11.3    | 0.788                    | 0.4              | 0.012             | 30               | 0.4   | 11.31 | 7          | UTL                                          |
|               | 1In-UTL_11.5    | 0.788                    | 0.4              | 0.012             | 30               | 0.4   | 11.51 | 7          | UTL                                          |
|               | 1In-UTL_12.0    | 0.788                    | 0.4              | 0.012             | 30               | 0.4   | 11.98 | 7          | UTL                                          |
|               | 1In-UTL_12.1    | 0.788                    | 0.4              | 0.012             | 30               | 0.4   | 12.1  | 7          | UTL+STF                                      |
|               | 1In-UTL_12.2    | 0.788                    | 0.4              | 0.012             | 30               | 0.4   | 12.23 | 6          | STF                                          |
|               | 3In-UTL_11.3    | 0.764                    | 0.4              | 0.036             | 30               | 0.4   | 11.30 | 21         | UTL                                          |
|               | 5 In-UTL_11.4   | 0.74                     | 0.4              | 0.06              | 30               | 0.4   | 11.41 | 18         | UTL                                          |
|               | 6 In-UTL_12.0   | 0.728                    | 0.4              | 0.072             | 30               | 0.4   | 11.96 | 14         | UTL                                          |
| 7 In-UTL_12.0 | 0.716           | 0.4                      | 0.084            | 30                | 0.4              | 12.00 | 14    | STF        |                                              |
| 7 In-UTL_11.9 | 0.716           | 0.4                      | 0.084            | 30                | 0.4              | 11.87 | 17    | UTL+STF    |                                              |

**Table SI-2.** Chemical composition and acid site concentrations for UTL zeolites

| Sample              | C (E),<br>mol. % | C (Brønsted a.c.),<br>$\mu\text{mol/g}$ | C (Lewis a.c.),<br>$\mu\text{mol/g}$ | $\Sigma$ (a.c.),<br>$\mu\text{mol/g}$ |
|---------------------|------------------|-----------------------------------------|--------------------------------------|---------------------------------------|
| <b>UTL_8.0</b>      | -                | -                                       | 42                                   | 42                                    |
| <b>5B-UTL_7.8</b>   | 1.0              | 16                                      | 40                                   | 56                                    |
| <b>1Al-UTL_12.0</b> | 2.3              | 49                                      | 48                                   | 97                                    |
| <b>1Ga-UTL_8.2</b>  | 2.3              | 11                                      | 72                                   | 83                                    |
| <b>2Fe-UTL_8.4</b>  | 2.7              | 7                                       | 74                                   | 81                                    |
| <b>5In-UTL_12.0</b> | 2.3              | 6                                       | 71                                   | 77                                    |

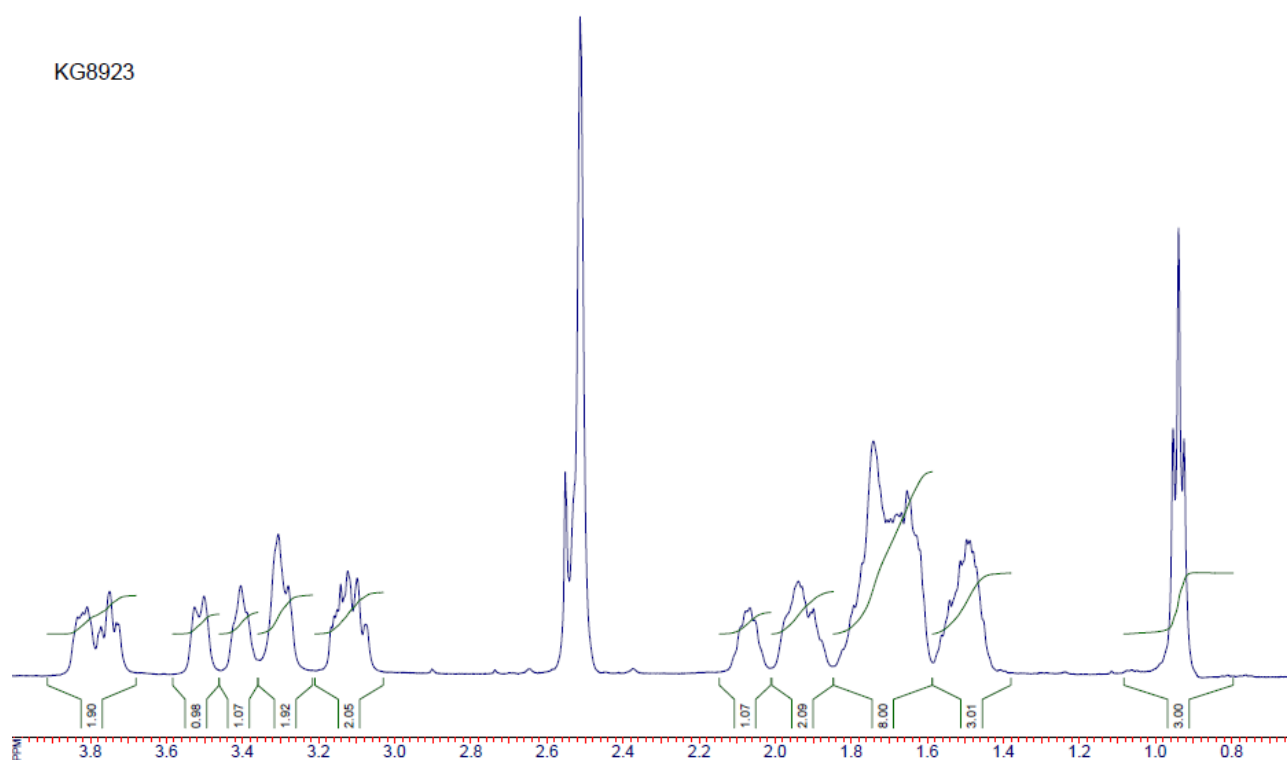

**Figure SI-3.**  $^1\text{H}$ NMR spectra for 7-ethyl-6-azoniaspiro [5.5] undecane bromide.
